# Supplementary material
Source: PubMed Central journal article supplement (PMC449761)
Supplement: 7600230s1.pdf [file 7600230s1.pdf]

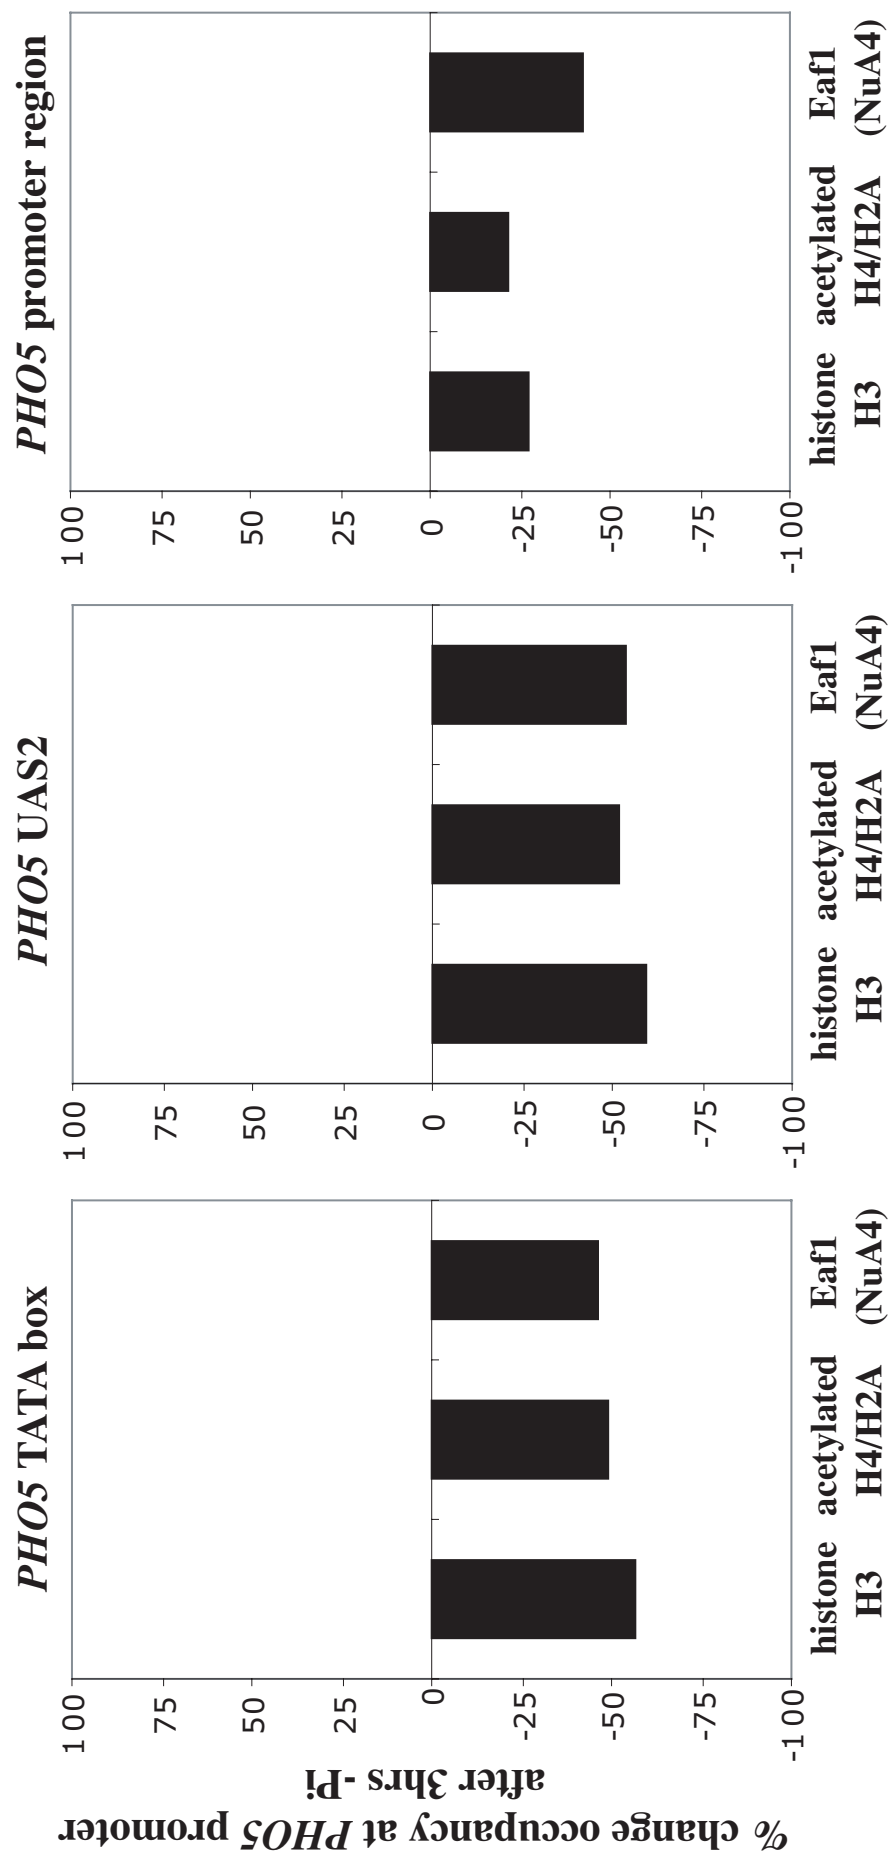

**Figure S1**

**Figure S1. Nucleosomal histone H4/H2A acetylation levels do not change over the *PHO5* promoter upon gene induction while a loss of nucleosomes and NuA4 complex is detected.** Chromatin immunoprecipitation experiment using anti-histone H3 (0.1  $\mu$ l, generous gift of A. Ruiz-Carrillo), anti-hyperacetylated histones H4/H2A (0.1  $\mu$ l, Upstate) and anti-Eaf1 (subunit specific to the NuA4 complex; 0.5  $\mu$ l, A. Auger and J. Côté, unpublished data) with wild type cells grown in phosphate rich (+Pi) media or after 3 hours in phosphate free (-Pi) media (as in figure 9A). IP ratios (*PHO5*/control locus) were calculated by realtime PCR reactions. The data is presented as a percentage change of IP ratio after 3 hours in inducing conditions (-Pi) compared to repressive conditions (+Pi). Three sets of *PHO5* primers were used in triplicate PCR reactions: a pair for the *PHO5* promoter region (position -363 to -70, same as in figures 5, 7, 8 and 9) and two pairs for much shorter regions surrounding the TATA box (nucleosome -1) and UAS2 (nucleosome -2). The same shorter PCR fragments were used by Reinke and Horz to demonstrate the loss of specific nucleosomes at the *PHO5* promoter upon activation (Reinke and Horz, 2003). Our results confirm these conclusions as we detect a significant loss of histone H3 occupancy at the *PHO5* promoter (57% decrease at the TATA box, 60% at UAS2 and 28% in an overall larger promoter region; the smaller decrease detected by the larger PCR fragment confirms the loss of very specific nucleosomes within *PHO5* promoter region). Very similar drop of signals were detected for hyperacetylated histones H4/H2A after 3 hours in inducing conditions (49% at TATA, 52% at UAS2 and 22% in the larger region). Taking into account the loss of nucleosomes (histone H3 signals) at the *PHO5* promoter upon induction, these data clearly indicate that H4/H2A acetylation levels remain unchanged on the nucleosomes still present at the *PHO5* promoter during the activation process. These results are

similar the ones obtained by Reinke and Horz (Reinke and Horz, 2003). Interestingly, chromatin immunoprecipitations with an antibody specific for Eaf1, a subunit only found in the NuA4 complex (A. Auger and J. Côté, unpublished data), also show a specific decrease of signal at the *PHO5* promoter after 3 hours in inducing conditions (46% at TATA, 54% at UAS2 and 43% in the larger region). These results suggest that the NuA4 complex itself is also lost from the *PHO5* promoter during the activation process, again supporting our model in which NuA4 is not required after the Pho4 binding/chromatin remodeling step.

## References

Reinke H, Horz W (2003) Histones are first hyperacetylated and then lose contact with the activated *PHO5* promoter. *Mol Cell*, **11**: 1599-1607
