# Supplementary material
Source: PubMed Central journal article supplement (PMC449761)
Supplement: 7600230s2.pdf [file 7600230s2.pdf]

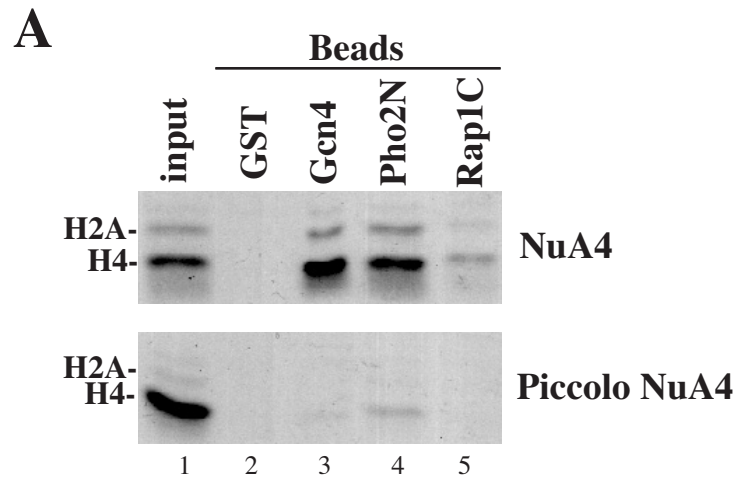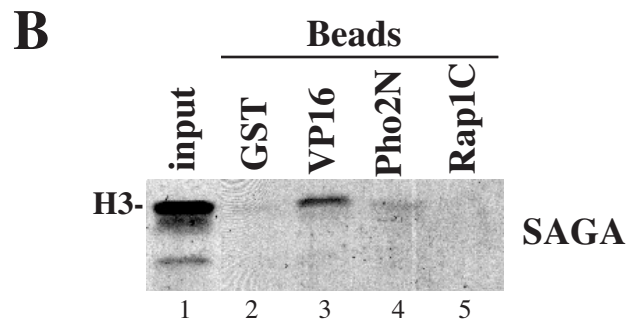

**Figure S2**

**Figure S2. NuA4 direct recruitment by Pho2 is not through the Tra1, Epl1, Yng2 or Esa1 subunits.** (A) Piccolo NuA4 complex comprising the Esa1-Epl1-Yng2 trimer does not interact with Pho2 in vitro. GST pulldown assays were performed as in figure 6C except there is approximately two-fold less GST-Pho2N than the other fusion proteins in this experiment. NuA4 and Piccolo NuA4 (picNuA4) complexes were purified by fractionation of whole cell extracts over Nickel-agarose and monoQ, and separated from each other by gel filtration on superose 6 (Boudreault et al., 2003). Peak fractions for each complex (21 and 29) were used in the experiment. HAT assays on chromatin were done with equivalent amounts of beads and input. (B) The SAGA HAT complex does not interact with Pho2 in vitro, indicating that Tra1, a subunit present in both SAGA and NuA4 and a known activator interaction surface (Brown et al., 2001), is not responsible for NuA4-Pho2 interaction. GST pulldown assays were performed as in (A) except that GST-VP16 was used instead of GST-Gcn4 as a positive control. The SAGA complex was partially purified using the same chromatographic steps as in (A) (Grant et al., 1997).

## References

- Boudreault AA, Cronier D, Selleck W, Lacoste N, Utley RT, Allard S, Savard J, Lane WS, Tan S, Côté J (2003) Yeast enhancer of polycomb defines global Esa1-dependent acetylation of chromatin. *Genes Dev*, **17**: 1415-1428
- Brown CE, Howe L, Sousa K, Alley SC, Carrozza MJ, Tan S, Workman JL (2001) Recruitment of HAT complexes by direct activator interactions with the ATM-related Tra1 subunit. *Science*, **292**: 2333-2337.
- Grant PA, Duggan L, Côté J, Roberts SM, Brownell JE, Candau R, Ohba R, Owen-Hughes T, Allis CD, Winston F, Berger SL, Workman JL (1997) Yeast Gcn5

functions in two multisubunit complexes to acetylate nucleosomal histones:  
characterization of an Ada complex and the SAGA (Spt/Ada) complex. *Genes  
Dev.*, **11**: 1640-1650
